# Supplementary material for: Estimation of aerosol and cloud radiative heating rate in tropical stratosphere using radiative kernel method
Source: Copernicus journal article supplement (doi:10.5194/egusphere-2024-2815), 2024-10-15
Supplement: Supplementary file [file egusphere-2024-2815-AC1-supplement.pdf]

```
! path:      $Source$
! author:    $Author: miacono $
! revision:  $Revision: 32234 $
! created:   $Date: 2018-02-08 15:00:23 -0500 (Thu, 08 Feb 2018) $
!-----
!
!-----
! Copyright (c) 2002-2016, Atmospheric & Environmental Research, Inc. (AER)
! All rights reserved.
!
! Redistribution and use in source and binary forms, with or without
! modification, are permitted provided that the following conditions are met:
! * Redistributions of source code must retain the above copyright
!   notice, this list of conditions and the following disclaimer.
! * Redistributions in binary form must reproduce the above copyright
!   notice, this list of conditions and the following disclaimer in the
!   documentation and/or other materials provided with the distribution.
! * Neither the name of Atmospheric & Environmental Research, Inc., nor
!   the names of its contributors may be used to endorse or promote products
!   derived from this software without specific prior written permission.
!
! THIS SOFTWARE IS PROVIDED BY THE COPYRIGHT HOLDERS AND CONTRIBUTORS "AS IS"
! AND ANY EXPRESS OR IMPLIED WARRANTIES, INCLUDING, BUT NOT LIMITED TO, THE
! IMPLIED WARRANTIES OF MERCHANTABILITY AND FITNESS FOR A PARTICULAR PURPOSE
! ARE DISCLAIMED. IN NO EVENT SHALL ATMOSPHERIC & ENVIRONMENTAL RESEARCH,
! INC.,
! BE LIABLE FOR ANY DIRECT, INDIRECT, INCIDENTAL, SPECIAL, EXEMPLARY, OR
! CONSEQUENTIAL DAMAGES (INCLUDING, BUT NOT LIMITED TO, PROCUREMENT OF
! SUBSTITUTE GOODS OR SERVICES; LOSS OF USE, DATA, OR PROFITS; OR BUSINESS
! INTERRUPTION) HOWEVER CAUSED AND ON ANY THEORY OF LIABILITY, WHETHER IN
! CONTRACT, STRICT LIABILITY, OR TORT (INCLUDING NEGLIGENCE OR OTHERWISE)
! ARISING IN ANY WAY OUT OF THE USE OF THIS SOFTWARE, EVEN IF ADVISED OF
! THE POSSIBILITY OF SUCH DAMAGE.
!
!                                     (http://www.rtweb.aer.com/)
!-----
```

Contents:

1. Instructions for INPUT\_RRTM
2. Instructions for IN\_CLD\_RRTM
3. Instructions for IN\_AER\_RRTM

## INPUT\_RRTM Instructions

### RECORD 1.1

CXID: 80 characters of user identification (80A1)

CXID(1) is the flag which determines program initialization and termination.  
The actual input data stream for RRTM commences with the record containing a '\$' in CXID(1). Any records that are read prior to a record containing a '\$' in CXID(1) are ignored.

### RECORD 1.2

|       |       |        |        |        |       |       |        |      |
|-------|-------|--------|--------|--------|-------|-------|--------|------|
| IAER, | IATM, | ISCAT, | ISTRM, | IOUT,  | IMCA, | ICLD, | IDELM, | ICOS |
| 20,   | 50,   | 83,    | 85,    | 88-90, | 94,   | 95,   | 99,    | 100  |

18x, I2, 29X, I1, 32X, I1, 1X, I1, 2X, I3, 3X, I1, I1, 3X, I1, I1

IAER (0,10) flag for aerosols  
= 0 no layers contain aerosols  
= 6 uses ECMWF global mean aerosol properties for one or all of six aerosol types. Aerosol optical thickness at 0.55 micron, ECAER, must be set manually in the main source module, rrtmg\_sw.1col.f90, to activate the aerosols with this option.  
= 10 one or more layers contain aerosols  
(requires the presence of file IN\_AER\_RRTM)

IATM (0,1) flag for RRTATM 1 = yes

ISCAT (0,1) switch for DISORT or simple two-stream scattering  
= 0 DISORT (unavailable)  
= 1 two-stream (default)

ISTRM flag for number of streams used in DISORT (when ISCAT equal to 0)  
= 0 - 4 streams (unavailable)  
= 1 - 8 streams (unavailable)  
= 2 - 16 streams (unavailable)

IOUT = -1 if no output is to be printed out.  
= 0 if the only output is for 820-50000 cm<sup>-1</sup>.

= n (n = 16-29) if the only output is from band n.  
 For the wavenumbers for each band, see Table I.  
 = 98 if output is generated for 15 spectral intervals, one  
 for the full shortwave spectrum (820-50000 cm<sup>-1</sup>), and one  
 for each of the 14 bands.

IMCA (0,1) flag for MclCA (Monte Carlo Independent Column Approximation)  
 for statistical representation of sub-grid cloud fraction  
 and cloud overlap  
 = 0 standard forward calculation; do not use MclCA (valid for  
 clear or overcast conditions only)  
 = 1 use MclCA (will perform statistical sample of 200 forward  
 calculations and output average flux and heating rates)

ICLD (0,1,2,3) flag for clouds  
 = 0 no cloudy layers in atmosphere  
 = 1 one or more cloudy layers present in atmosphere. Cloud layers  
 are treated as overcast only for IMCA = 0, or they are treated  
 using a RANDOM overlap assumption for IMCA = 1.  
 (requires the presence of file IN\_CLD\_RRTM for column model)  
 (available for IMCA = 0 or 1)  
 = 2 one or more cloudy layers present in atmosphere. Cloud layers  
 are treated using a MAXIMUM/RANDOM overlap assumption.  
 (requires the presence of file IN\_CLD\_RRTM for column model)  
 (available only for IMCA = 1)  
 = 3 one or more cloudy layers present in atmosphere. Cloud layers  
 are treated using a MAXIMUM overlap assumption.  
 (requires the presence of file IN\_CLD\_RRTM for column model)  
 (available only for IMCA = 1)

Measurement comparison flags:

IDELM (0,1) flag for outputting downwelling fluxes computed using the delta-  
 M scaling approximation

= 0 output "true" direct and diffuse downwelling fluxes (default)  
 = 1 output direct and diffuse downwelling fluxes computed with delta-  
 M approximation

(Note: The delta-M approximation is always used internally in  
 RRTMG\_SW to compute the total

downwelling flux at each level. What the IDELM flag determines is  
 whether the components

of the downwelling flux, the direct and diffuse fluxes, that are output are  
 the actual direct

and diffuse fluxes (IDELM = 0) or are those computed using the delta-M  
 approximation (IDELM = 1).

ICOS = 0 there is no need to account for instrumental cosine response (default)  
= 1 to account for instrumental cosine response in the computation of  
the direct and diffuse fluxes

(unavailable)

= 2 to account for instrumental cosine response in the computation of  
the diffuse fluxes only

(unavailable)

(Note: ICOS = 1 and ICOS = 2 requires the presence of the file  
COSINE\_RESPONSE, which should

consist of lines containing pairs of numbers (ANG, COSFAC), where  
COSFAC is the instrumental cosine

response at the angle ANG.)

RECORD 1.2.1

JULDAT, SZA, ISOLVAR, SCON, SOLCYCFRAC, (SOLVAR(IB),IB=16,29)  
13-15, 19-25, 29-30, 31-40, 41-50, 51-190  
12X, I3, 3X, F7.4, 3X, I2, F10.4, F10.5, 14F10.5

JULDAT Julian day associated with calculation (1-365/366 starting January 1).

Used to calculate Earth distance from sun. A value of 0 (default) indicates no scaling of solar source function using earth-sun distance.

SZA Solar zenith angle in degrees (0 degrees is overhead).

ISOLVAR Solar variability option [-1,0,1,2,3]

= -1 (when SCON .EQ. 0.0): no solar variability; each band uses the Kurucz extraterrestrial solar irradiance, corresponding to a spectrally integrated

solar constant of 1368.22 Wm<sup>-2</sup> (method used in rrtmg\_sw\_v3.91 and earlier)

= -1 (when SCON .NE. 0.0): solar variability active; baseline solar irradiance

of 1368.22 Wm<sup>-2</sup> is scaled to SCON, solar variability is determined (optional)

by non-zero scale factors for each band defined by SOLVAR

= 0 (when SCON .EQ. 0.0): no solar variability; each band uses the solar constant

from the NRLSSI2 model of 1360.85 Wm<sup>-2</sup> (for the spectral range 100-50000 cm<sup>-1</sup>)

with quiet sun, facular and sunspot contributions fixed to the mean of

Solar Cycles 13-24 and averaged over the mean solar cycle

= 0 (when SCON .NE. 0.0): no solar variability; baseline solar irradiance of 1360.85 Wm<sup>-2</sup> (for the spectral range 100-50000 cm<sup>-1</sup>) is scaled to SCON

= 1 solar variability active; solar cycle contribution determined by input of SOLCYCFRAC, a fraction representing the phase of the solar

cycle, with  
with this  
Cycles 13-24  
amplitude scale  
facular and sunspot

facular brightening and sunspot blocking effects varying in time  
fraction through their mean variations over the average of Solar  
(corresponding to a solar constant of 1360.85 Wm<sup>-2</sup>); two  
factors provided in SOLVAR allow independent adjustment of  
effects from their mean solar cycle amplitudes

= 2 solar variability active; solar cycle contribution determined by direct  
specification of Mg (facular) and SB (sunspot) indices consistent with the  
NRLSSI2 solar model; these are provided in SOLVAR and are  
used to model the  
provided)  
option can

solar variability at a specific time for a specific solar cycle  
(SCON = 0.0 only; solar constant depends on Mg and SB indices  
Further information on setting the Mg and SB indices for this  
be found at the NRLSSI model github site:  
<https://github.com/lasp/nrlssi>.

integrated  
sunspot  
irradiance  
determined (optional)  
applied to SCON

= 3 (when SCON .EQ. 0.0): no solar variability; each band uses the NRLSSI2  
extraterrestrial solar irradiance, corresponding to a spectrally  
solar constant of 1360.85 Wm<sup>-2</sup> with quiet sun, facular and  
contributions averaged over the mean of Solar Cycles 13-24  
= 3 (when SCON .NE. 0.0): solar variability active; baseline solar  
of 1360.85 Wm<sup>-2</sup> is scaled to SCON, solar variability is  
by non-zero scale factors for each band defined by SOLVAR and

SCON  
scaled  
solar cycle

For ISOLVAR = -1 or 0:  
Total solar irradiance (if SCON > 0, internal solar irradiance is  
to this value)  
For ISOLVAR = 1:  
Solar constant; integral of total solar irradiance averaged over  
(if SCON > 0, internal solar irradiance is scaled to this value)

For ISOLVAR = 2:  
 CON must be 0.0, since total solar irradiance is defined by the  
 indices provided in SOLVAR

Mg and SB

For ISOLVAR = 3:  
 Total solar irradiance before individual band scale factors are  
 applied  
 (if CON > 0 internal solar irradiance is scaled to this value)  
 Set CON = 0.0 to use internal solar irradiance, which depends on  
 ISOLVAR

SOLCYCFRAC Solar cycle fraction (0-1); fraction of the way through the mean 11-  
 year  
 cycle with 0.0 defined as the first day of year 1 and 1.0 defined as the  
 last day of year 11 (ISOLVAR=1 only). Note that for the combined  
 effect of  
 the solar constant of 1360.85, and the mean facular brightening and  
 sunspot  
 dimming components (without scaling), the minimum total solar  
 irradiance of  
 1360.49 occurs at SOLCYCFRAC = 0.0265, and the maximum total  
 solar irradiance  
 of 1361.34 occurs at SOLCYCFRAC = 0.3826.

SOLVAR Solar variability scaling factors or indices (ISOLVAR=-1,1,2,3 only)

For ISOLVAR = 1:  
 SOLVAR(1) Facular (Mg) index amplitude scale factor  
 SOLVAR(2) Sunspot (SB) index amplitude scale factor

For ISOLVAR = 2:  
 SOLVAR(1) Facular (Mg) index as defined in the NRLSSI2  
 model;  
 used for modeling time-specific solar activity  
 SOLVAR(2) Sunspot (SB) index as defined in the NRLSSI2  
 model;  
 used for modeling time-specific solar activity

For ISOLVAR = -1 or 3:  
 SOLVAR(1:14) Band scale factors for modeling spectral variation  
 of  
 averaged solar cycle in each shortwave band



IEMIS, IREFLECT, (SEMISS(IB),IB=16,29)

12, 15, 16-85

11X, I1, 2X, I1, 14F5.3

(Note: surface reflectance = 1 - surface emissivity)

IEMIS = 0 each band has surface emissivity equal to 1.0

= 1 each band has the same surface emissivity (equal to SEMISS(16))

= 2 each band has different surface emissivity (for band IB, equal to SEMISS(IB))

IREFLECT = 0 for Lambertian reflection at surface, i.e. reflected radiance is equal at all angles

= 1 for specular reflection at surface, i.e. reflected radiance at angle is equal to downward surface radiance at same angle multiplied by the reflectance. THIS OPTION CURRENTLY NOT IMPLEMENTED.

SEMISS the surface emissivity for each band (see Table I). All values must be greater than 0 and less than or equal to 1. If IEMIS = 1, only the first value of SEMISS (SEMISS(16)) is considered. If IEMIS = 2 and no surface emissivity value is given for SEMISS(IB), a value of 1.0 is used for band IB.

\*\*\*\*\*  
\*\*\*\*\* these records applicable only if RRTATM not selected (IATM=0) \*\*\*\*\*

LAYER INPUT (MOLECULES ONLY)

RECORD 2.1

IFORM, NLAYRS, NMOL

2 3-5, 6-10

1X,I1 I3, I5

IFORM (0,1) column amount format flag  
= 0 read PAVE, WKL(M,L), WBROADL(L) in F10.4, E10.3, E10.3 formats  
(default)  
= 1 read PAVE, WKL(M,L), WBROADL(L) in E15.7 format

NLAYRS number of layers (maximum of 200)

NMOL value of highest molecule number used (default = 7;  
maximum of 35)

See Table II for molecule numbers.

RECORD 2.1.1

PAVE, TAVE, PZ(L-1), TZ(L-1), PZ(L), TZ(L)

1-10, 11-20, 44-51, 52-58, 66-73, 74-80

F10.4, F10.4, 23X, F8.3, F7.2, 7X, F8.3, F7.2

PAVE average pressure of layer (millibars) (\*\*If IFORM=1, then PAVE in  
E15.7 format\*\*)

TAVE average temperature of layer (K)

PZ(L-1) pressure at bottom of layer L

TZ(L-1) temperature at bottom of layer L - used by RRTM for Planck

## Function Calculation

**\*\* NOTE \*\*** PZ(L-1) and TZ(L-1) are only required for the first layer. RRTM assumes that these quantities are equal to the top of the previous layer for  $L > 1$ .

PZ(L) pressure at top of layer L

TZ(L) temperature at top of layer L - used by RRTM for Planck Function Calculation

RECORD 2.1.2

(WKL(M,L), M=1, 7), WBROADL(L)

(8E10.3)

WKL(M,L) column densities or mixing ratios for 7 molecular species  
(molecules/cm\*\*2)

WBROADL(L) column density for broadening gases (molecules/cm\*\*2)

\*\*NOTE\*\* If IFORM=1, then WKL(M,L) and WBROADL(L) are in  
8E15.7 format

RECORD 2.1.3 only if (NMOL .GT . 7) # records depends on NMOL

(WKL(M,L), M=8, NMOL)

(8E10.3)

NMOL is set from LINFIL (TAPE3)

(NMOL limited to 35 in RRTM) \*\*NOTE: If IFORM=1 then  
WKL(M,L) in 8E15.7 format\*\*

REPEAT RECORDS 2.1.1 through 2.1.3 for the remaining layers (up to NLAYRS)

\*\*\*\*\*  
\*\*\*\*\* these records applicable if RRTATM selected (IATM=1) \*\*\*\*\*

RECORD 3.1

MODEL, IBMAX, NOPRNT, NMOL, IPUNCH, MUNITS, RE, CO2MX,  
REF\_LAT

5, 15, 25, 30, 35, 39-40, 41-50, 71-80, 81-90

I5, 5X, I5, 5X, I5, I5, I5, 3X, I2, F10.3, 20X, F10.3, F10.3

MODEL selects atmospheric profile

- = 0 user supplied atmospheric profile
- = 1 tropical model
- = 2 midlatitude summer model
- = 3 midlatitude winter model
- = 4 subarctic summer model
- = 5 subarctic winter model
- = 6 U.S. standard 1976

IBMAX selects layering for RRTM

- = 0 RRTM layers are generated internally (default)
- > 0 IBMAX is the number of layer boundaries read in on Record

3.3B which are

used to define the layers used in RRTM calculation

- NOPRNT = 0 full printout  
= 1 selects short printout

NMOL number of molecular species (default = 7; maximum value is 35)

- IPUNCH = 0 layer data not written (default)  
= 1 layer data written to unit IPU (TAPE7)

- MUNITS = 0 write molecular column amounts to TAPE7 (if IPUNCH = 1,  
default)  
= 1 write molecular mixing ratios to TAPE7 (if IPUNCH = 1)

RE radius of earth (km)

defaults for RE=0:

- a) MODEL 0,2,3,6 RE = 6371.23 km
- b) 1 RE = 6378.39 km
- c) 4,5 RE = 6356.91 km

CO2MX mixing ratio for CO2 (ppm). Default is 330 ppm.

REF\_LAT latitude of location of calculation (degrees)

defaults for REF\_LAT = 0:

- a) MODEL 0,2,3,6 REF\_LAT = 45.0 degrees
- b) MODEL 1 REF\_LAT = 15.0
- c) MODEL 4,5 REF\_LAT = 60.0

---

RECORD 3.2

HBOUND, HTOA

1-10, 11-20

F10.3, F10.3

HBOUND altitude of the surface (km)

HTOA altitude of the top of the atmosphere (km)

RECORD 3.3 options

RECORD 3.3A For IBMAX = 0 (from RECORD 3.1)

AVTRAT, TDIFF1, TDIFF2, ALTD1, ALTD2

1-10, 11-20, 21-30, 31-40, 41-50

F10.3, F10.3, F10.3, F10.3, F10.3

AVTRAT maximum Voigt width ratio across a layer  
(if zero, default = 1.5)

TDIFF1 maximum layer temperature difference at  
ALTD1 (if zero, default = 5 K)

TDIFF2 maximum layer temperature difference at  
ALTD2 (if zero, default = 8 K)

ALTD1 altitude of TDIFF1 (if zero, default = 0 Km)

ALTD2 altitude of TDIFF2 (if zero, default = 100 Km)

RECORD 3.3B            For  $IBMAX > 0$  (from RECORD 3.1)

ZBND(I), I=1, IBMAX    altitudes of RRTM layer boundaries

(8F10.3)

If  $IBMAX < 0$

PBND(I), I=1, ABS(IBMAX) pressures of LBLRTM layer boundaries

(8F10.3)

-----  
--



-----  
User Defined Atmospheric Profile  
-----

----- (MODEL = 0) -----

RECORD 3.4

IMMAX, HMOD

5, 6-29

I5, 3A8

IMMAX number of atmospheric profile boundaries

If IMMAX is set to a negative value, the level boundaries are specified in PRESSURE (mbars).

HMOD 24 character description of profile

RECORD 3.5

ZM, PM, TM, JCHARP, JCHART, (JCHAR(K),K =1,28)

1-10, 11-20, 21-30, 36, 37, 41 through 68

E10.3, E10.3, E10.3, 5x, A1, A1, 3X, 28A1

ZM boundary altitude (km). If IMMAX < 0, altitude levels are computed from pressure levels PM. If any altitude levels are provided, they are ignored if IMMAX < 0 (exception: The first input level must have an accompanying ZM for input into the hydrostatic equation)

PM pressure (units and input options set by JCHARP)

TM temperature (units and input options set by JCHART)

JCHARP        flag for units and input options for pressure (see Table II)

JCHART        flag for units and input options for temperature (see Table II)

JCHAR(K)      flag for units and input options for  
the K'th molecule (see Table II)

RECORD 3.6.1 ... 3.6.N

VMOL(K), K=1, NMOL

8E10.3

VMOL(K) density of the K'th molecule in units set by JCHAR(K)

REPEAT records 3.5 and 3.6.1 to 3.6.N for each of the remaining IMMAX boundaries

-----  
User Defined Atmospheric Profile

----- (IPRFL = 0) -----

RECORD 3.8

LAYX, IZORP, XTITLE

5, 10, 11-60

I5, I5 A50

LAYX number of atmospheric profile boundaries

IZORP (0,1) flag which determines value of ZORP on Record 3.8.1

= 0 ZORP is an altitude in KM

= 1 ZORP is a pressure in millibars

XTITLE 50 character description of profile

RECORD 3.8.1

ZORP, (JCHAR(K),K =1,28)

1-10, 16 through 50

F10.3, 5X, 35A1

ZORP boundary altitude (km) or pressure (millibars) as determined by IZORP  
on Record 3.8

JCHAR(K) flag for units and input options for  
the K'th cross-section

JCHAR = 1-1 - default to value for specified model  
atmosphere

= " ",A - volume mixing ratio (ppmv)

RECORD 3.8.2 ... 3.8.N

DENX(K), K=1, IXMOLS

8E10.3

DENX(K) density of the K'th cross-section in units set by JCHAR(K)

REPEAT records 3.8.1 to 3.8.N for each of the remaining LAYX boundaries

-----

TABLE I. RRTM Bands and Included Species

| Band # | Wavenumber Range (cm <sup>-1</sup> ) | 1050 - 96 mb                                      | 96 - 0.01 mb                       |
|--------|--------------------------------------|---------------------------------------------------|------------------------------------|
| 16     | 2600-3250                            | H <sub>2</sub> O,CH <sub>4</sub>                  | CH <sub>4</sub>                    |
| 17     | 3250-4000                            | H <sub>2</sub> O,CO <sub>2</sub>                  | H <sub>2</sub> O,CO <sub>2</sub>   |
| 18     | 4000-4650                            | H <sub>2</sub> O,CH <sub>4</sub>                  | CH <sub>4</sub>                    |
| 18     | 4650-5150                            | H <sub>2</sub> O,CO <sub>2</sub>                  | CO <sub>2</sub>                    |
| 20     | 5150-6150                            | H <sub>2</sub> O,CH <sub>4</sub> *                | H <sub>2</sub> O,CH <sub>4</sub> * |
| 21     | 6150-7700                            | H <sub>2</sub> O,CO <sub>2</sub>                  | H <sub>2</sub> O,CO <sub>2</sub>   |
| 22     | 7700-8050                            | H <sub>2</sub> O,O <sub>2</sub>                   | O <sub>2</sub>                     |
| 23     | 8050-12850                           | H <sub>2</sub> O                                  | nothing                            |
| 24     | 12850-16000                          | H <sub>2</sub> O,O <sub>2</sub> ,O <sub>3</sub> * | O <sub>2</sub> ,O <sub>3</sub> *   |
| 25     | 16000-22650                          | H <sub>2</sub> O,O <sub>3</sub> *                 | O <sub>3</sub> *                   |
| 26     | 22650-29000                          | nothing                                           | nothing                            |
| 20     | 29000-38000                          | O <sub>3</sub>                                    | O <sub>3</sub>                     |
| 28     | 38000-50000                          | O <sub>3</sub> ,O <sub>2</sub>                    | O <sub>3</sub> ,O <sub>2</sub>     |
| 29     | 820-2600                             | H <sub>2</sub> O                                  | CO <sub>2</sub>                    |

\* Included as minor species.

TABLE II. Units and input options for the K'th molecule

TABLE II

USER OPTIONS FOR PRESSURE, TEMPERATURE, AND MOLECULAR DENSITY

JCHARP

|          |       |                                                 |
|----------|-------|-------------------------------------------------|
| PRESSURE | 1-6   | default to value for specified model atmosphere |
| (JCHARP) | " ",A | pressure in (mb)                                |
|          | B     | " " (atm)                                       |
|          | C     | " " (torr)                                      |

JCHART

|             |       |                                                 |
|-------------|-------|-------------------------------------------------|
| TEMPERATURE | 1-6   | default to value for specified model atmosphere |
| (JCHART)    | " ",A | ambient temperature in deg (K)                  |
|             | B     | " " " " " " (C)                                 |

JCHAR(M)

|                   |           |          |            |            |            |      |
|-------------------|-----------|----------|------------|------------|------------|------|
| (M): AVAILABLE    | ( 1) H2O  | ( 2) CO2 | ( 3) O3    | ( 4) N2O   | ( 5) CO    | ( 6) |
| CH4 ( 7)          | O2        |          |            |            |            |      |
| MOLECULAR SPECIES | ( 8) NO   | ( 9) SO2 | (10) NO2   | (11) NH3   | (12) HNO3  |      |
| (13) OH (14) HF   |           |          |            |            |            |      |
|                   | (15) HCL  | (16) HBR | (17) HI    | (18) CLO   | (19) OCS   | (20) |
| H2CO (21) HOCL    |           |          |            |            |            |      |
|                   | (22) N2   | (23) HCN | (24) CH3CL | (25) H2O2  | (26) C2H2  | (27) |
| C2H6 (28) PH3     |           |          |            |            |            |      |
|                   | (29) COF2 | (30) SF6 | (31) H2S   | (32) HCOOH | (33) EMPTY | (34) |
| EMPTY (35) EMPTY  |           |          |            |            |            |      |

potential choice of units for above species:

- |             |                                                   |
|-------------|---------------------------------------------------|
| JCHAR = 1-6 | - default to value for specified model atmosphere |
| = " ",A     | - volume mixing ratio (ppmv)                      |
| = B         | - number density (cm <sup>-3</sup> )              |
| = C         | - mass mixing ratio (gm/kg)                       |
| = D         | - mass density (gm m <sup>-3</sup> )              |
| = E         | - partial pressure (mb)                           |
| = F         | - dew point temp (K) *H2O only*                   |
| = G         | - dew point temp (C) *H2O only*                   |
| = H         | - relative humidity (percent) *H2O only*          |
| = I         | - available for user definition                   |

JCHAR must be less than "J"

\*\*\*\*\*

IN\_CLD\_RRTM Instructions (this file required if ICLD = 1 in Record 1.2 of INPUT\_RRTM)

-----  
RECORD C1.1

INFLAG, ICEFLAG, LIQFLAG

5 10 15

4X, I1, 4X, I1, 4X, I1

Note: ICEFLAG and LIQFLAG are required only if INFLAG = 2.

INFLAG = 0 direct specification of optical depths of clouds;  
cloud fraction and cloud optical depth (gray), single scattering  
albedo,  
and N-str moments of the phase function

= 2 calculation of separate ice and liquid cloud optical depths, with  
parameterizations determined by values of ICEFLAG and LIQFLAG.  
Cloud fraction, cloud water path, cloud ice fraction, and  
effective ice radius are input for each cloudy layer for all  
parameterizations. If LIQFLAG = 1, effective liquid droplet radius  
is also needed. If ICEFLAG = 1, generalized effective size is  
is also needed.

ICEFLAG = 0 inactive  
= 1 the optical depths (non-gray) due to ice clouds are computed as  
closely as  
possible to the method in E.E. Ebert and J.A. Curry, JGR, 97, 3831-  
3836 (1992).

= 2 the optical properties are computed by a method based on the  
parameterization

of spherical ice particles in the RT code, STREAMER v3.0  
(Reference:

Key. J., Streamer User's Guide, Cooperative Institute for  
Meteorological Satellite Studies, 2001, 96 pp.).

= 3 the optical depths are computed by a method based on the  
parameterization  
of ice clouds due to Q. Fu, J. Clim., 9, 2058 (1996).

LIQFLAG = 0 inactive



= 1 the optical depths (non-gray) due to water clouds are computed  
by a method based on the parameterization of water clouds due to Y.X. Hu  
and K. Stamnes,  
J. Clim., 6, 728-742 (1993).

These methods are further detailed in the comments in the file  
'rrtmg\_sw\_cldprop.F90'  
and the module 'rrtmg\_sw\_susrtop.F90'.

RECORD C1.2 (one record for each cloudy layer, if INFLAG = 0)

|             |        |          |                |              |              |
|-------------|--------|----------|----------------|--------------|--------------|
| TESTCHAR,   | LAY,   | CLDFRAC, | TAUCLD or CWP, | SINGLE-SCAT, | PMOM(0:NSTR) |
|             |        | ALBEDO   |                |              |              |
| 1,          | 3-5,   | 6-15,    | 16-25,         | 26-35,       | 36-196       |
| A1, 1X, I3, | E10.5, |          | E10.5,         | E10.5,       | 16E10.5      |

TESTCHAR control character -- if equal to '%', cloud input processing is terminated

LAY layer number of cloudy layer. The layer numbering refers to the ordering for the upward radiative transfer, i.e. bottom to top. For IATM = 0 (Record 1.2), each layer's number is equal to the position of its Record 2.1.1 in the grouping of these records. For example, the second Record 2.1.1 occurring after Record 2.1 corresponds to the second layer. For IATM = 1 (Record 1.2) and IBMAX > 0 (Record 3.1), layer n corresponds to the region

between

altitudes n and n+1 in the list of layer boundaries in Record 3.3B. For IATM = 1 (Record 1.2) and IBMAX = 0 (Record 3.1), the layer numbers can be determined by running RRTM for the cloudless

case

and examining the TAPE6 output from this run.

CLDFRAC cloud fraction for the layer

TAUCLD (INFLAG = 0 only) total (ice and water) optical depth for the layer

SINGLE-SCATTERING Single-scattering albedo for cloudy layer (unitless)  
ALBEDO

PMOM Moments of the phase function, from 0 to NSTR. (unitless)

Note: The true optical depth, single-scattering albedo, and phase function moments must be input.

The Delta-M scaling, using the standard Henyey-Greenstein approach, is applied to the

input cloud properties.

RECORD C1.3 (one record for each cloudy layer, INFLAG = 2)

|             |        |          |                |          |             |            |
|-------------|--------|----------|----------------|----------|-------------|------------|
| TESTCHAR,   | LAY,   | CLDFRAC, | TAUCLD or CWP, | FRACICE, | EFFSIZEICE, | EFFSIZELIQ |
| 1,          | 3-5,   | 6-15,    | 16-25,         | 26-35,   | 36-45,      | 46-55      |
| A1, 1X, I3, | E10.5, | E10.5,   | E10.5,         | E10.5,   | E10.5,      | E10.5      |

TESTCHAR control character -- if equal to '%', cloud input processing is terminated

LAY layer number of cloudy layer. The layer numbering refers to the ordering for the upward radiative transfer, i.e. bottom to top. For IATM = 0 (Record 1.2), each layer's number is equal to the position of its Record 2.1.1 in the grouping of these records. For example, the second Record 2.1.1 occurring after Record 2.1 corresponds to the second layer. For IATM = 1 (Record 1.2) and IBMAX > 0 (Record 3.1), layer n corresponds to the region

between

altitudes n and n+1 in the list of layer boundaries in Record 3.3B. For IATM = 1 (Record 1.2) and IBMAX = 0 (Record 3.1), the layer numbers can be determined by running RRTM for the cloudless

case

and examining the TAPE6 output from this run.

CLDFRAC cloud fraction for the layer.

TAUCLD (INFLAG = 0 only) total (ice and water) optical depth for the layer  
or CWP (INFLAG > 0) cloud water path for the layer (g/m<sup>2</sup>)

FRACICE (INFLAG = 2) fraction of the layer's cloud water path in the form of ice particles

EFFSIZEICE (INFLAG = 2 and ICEFLAG = 1) Effective radius of spherical ice crystals with equivalent projected area to hexagonal ice particles following Ebert and Curry (1992).  
Valid sizes are 13.0 - 130.0 microns.

(INFLAG = 2 and ICEFLAG = 2) Effective radius of spherical ice crystals,  $r_e$  (see STREAMER manual for definition of this parameter)  
Valid sizes are 5.0 - 131.0 microns.

(INFLAG = 2 and ICEFLAG = 3) Generalized effective size of

hexagonal

ice crystals, dge (see Q. Fu, 1996, for definition of this parameter)  
Valid sizes are 5.0 - 140.0 microns.

NOTE: The size descriptions for effective radius and generalized effective size are NOT equivalent. See the particular references for the appropriate definition.

(microns) EFFSIZELIQ (INFLAG = 2 and LIQFLAG = 1) Liquid droplet effective radius, re

Valid sizes are 2.5 - 60.0 microns.

IN\_AER\_RRTM Instructions (this file required if IAER = 1 in Record 1.2 of INPUT\_RRTM)

-----  
RECORD A1.1

NAER

5

3X, I2

NAER number of different aerosol types (maximum of 99). An aerosol type is characterized by a specified spectral dependence of aerosol optical depth, single-scattering albedo, and phase function; a change to any of these quantities requires a new aerosol type. Each aerosol type requires the presence of Records A2.1 - A2.3.

RECORD A2.1

NLAY, IAOD, ISSA, IPHA, (AERPAR(I),I=1,3)

5, 10, 15, 20, 21-44

3X, I2, 4X, I1, 4X, I1, 4X, I1, 3F8.2

NLAY number of layers containing the aerosol with the specified properties: spectral dependence of aerosol optical depth (IAOD,AERPAR), single-scattering albedo (ISSA, SSA), and phase function (IPHA,PHASE).

Note that each layer can contain only one aerosol type.

IAOD (0,1) flag for specifying the spectral dependence of aerosol optical depth  
= 0 spectral dependence determined by Angstrom-like relationship (Molineaux et al.; see below)

= 1 aerosol optical depths directly input for each layer and band in Record A2.1.1

ISSA (0,1) flag for gray or spectrally dependent single scattering albedo  
 = 0 gray SSA (equal to SSA(16))  
 = 1 spectrally dependent SSA (for band IB, equal to SSA(16))

IPHA (0,1,2) phase function flag  
 = 0 spectrally gray phase function (equal to PHASE(16) in first and only Record 2.3); uses  
 Henyey-Greenstein phase function  
 = 1 spectrally dependent phase function (for band IB, equal to PHASE(16) in first and only Record 2.3); uses Henyey-Greenstein phase function  
 = 2 direct specification of moments of phase function. See Record 2.3.

AERPAR (only used if IAOD = 0) array of parameters for obtaining aerosol optical depth as a function of wavelength, as described below:

$$AOD = AOD1 * (AERPAR(2) + AERPAR(3) * (\lambda/\lambda_1)) / ((AERPAR(2) + AERPAR(3) - 1) + (\lambda/\lambda_1)**AERPAR(1))$$

where

$\lambda$  = wavelength in microns

$\lambda_1$  = 1 micron

AOD = aerosol optical depth at wavelength  $\lambda$

AOD1 = aerosol optical depth at 1 micron (see Record A2.1.1).

This is a version of Eq. 13 from Molineaux et al, Appl. Optics, 1998. The default values of AERPAR(1), AERPAR(2), and AERPAR(3), which are 0, 1, and 0, respectively, yield an aerosol with spectrally grey extinction.

(Note: To obtain Angstrom relation, set AERPAR(2)=1., AERPAR(3)=0., and AERPAR(1) equal to Angstrom exponent.)

#### RECORD A2.1.1

(if IAOD = 0)

LAY, AOD1

5, 6-12

2X, I3, F7.4

(if IAOD = 1)

LAY, (AOD(IB),IB=16,29)

5, 6-103

2X, I3, 14F7.4

LAY layer number of aerosol layer. (The layer numbering refers to the ordering for the upward radiative transfer, i.e. bottom to top. For IATM = 0 (Record 1.2), each layer's number is equal to the position of its Record 2.1.1 in the grouping of these records. For example, the second Record 2.1.1 occurring after Record 2.1 corresponds to the second layer. For IATM = 1 (Record 1.2) and IBMAX > 0 (Record 3.1), layer n corresponds to the region

between

altitudes n and n+1 in the list of layer boundaries in Record 3.3B. For IATM = 1 (Record 1.2) and IBMAX = 0 (Record 3.1), the layer numbers can be determined by running RRTM for the cloudless

case

and examining the TAPE6 output from this run.(

(if IAOD = 0)

AOD1 aerosol optical depth at 1 micron; can be used to scale the amount of aerosols in the layer; see Record A2.1

(if IAOD = 1)

AOD aerosol optical depth for each band

REPEAT RECORD A2.1.1 for the remaining layers containing this aerosol type. There should be NLAY

records A2.1.1

RECORD A2.2

(SSA(IB),IB=16,29)

(1-70)

## 14F5.2

SSA Single scattering albedo for each band; must be equal to or greater than zero and less than or equal to 1. If ISSA equals 0, then only the first value of SSA (SSA(16)) is considered.

### RECORD A2.3

(PHASE(IB),IB=16,29)

(1-70)

## 14F5.2

PHASE Moments (starting with first moment) of the phase function for band IB. In this implementation,

the phase function  $P(u)$  for each band is defined as

$$P(u) = \sum \text{over streams } l \{ (2l+1) (\text{PHASE}_l) (P_l(u)) \}$$

where

$$u = \cos(\theta)$$

PHASE<sub>l</sub> = the lth moment of the phase function

$P_l(u)$  = lth Legendre polynomial,

and the number of streams to be used in DISORT (using the delta-M method) is determined

by the value of ISTRM in Record 1.2 of INPUT\_RRTM.

For IPHA = 0 or IPHA = 1, the Henyey-Greenstein phase function is used and only the first

moment of the phase function needs to be specified, so only one Record A2.3 is read.

(Note: The first moment of the phase function is the asymmetry parameter.) If IPHA equals

0, then only the first value of PHASE (PHASE(16)) is considered.

For IPHA = 2, the number of A2.3 records should be equal to the number of streams.

REPEAT RECORDS A2.1 through A2.3 for the remaining aerosol types. There should be NAER



sets (A2.1 through A2.3) of records.
